# Supplementary material for: The Relationship among Bowel [18]F-FDG PET Uptake, Pathological Complete Response, and Eating Habits in Breast Cancer Patients Undergoing Neoadjuvant Chemotherapy
Source: Nutrients. 2023 Jan 1;15(1):211. doi: 10.3390/nu15010211 (PMC9824388; doi:10.3390/nu15010211)
Supplement: Supplementary file 1 [file nutrients-15-00211-s001.zip › Figure S1.pdf]

Indication for standard  
NeoAdjuvant Chemotherapy  
(NAC) for Breast Cancer

Whole-body staging [18]F-FDG  
PET/CT scan

Survey on eating habits and  
physical exercise

Anthracycline-based NAC  
followed by taxane-based  
NAC+/- trastuzumab  
(6 months)

Surgery and pathological  
evaluation of response

Six-monthly clinical-instrumental  
follow-up
