# Supplementary material for: The Relationship among Bowel [18]F-FDG PET Uptake, Pathological Complete Response, and Eating Habits in Breast Cancer Patients Undergoing Neoadjuvant Chemotherapy
Source: Nutrients. 2023 Jan 1;15(1):211. doi: 10.3390/nu15010211 (PMC9824388; doi:10.3390/nu15010211)
Supplement: Supplementary file 1 [file nutrients-15-00211-s001.zip › Figure S2.pdf]

Name \_\_\_\_\_ Surname \_\_\_\_\_ Date \_\_\_\_\_

1. How do you define your diet?

☐ omnivorous or varied    ☐ vegetarian    ☐ vegan

2. How many times a week do you eat:

milk \_\_\_\_\_

dairy products \_\_\_\_\_

alcohol \_\_\_\_\_

spirits \_\_\_\_\_

white meat \_\_\_\_\_

red meat \_\_\_\_\_

eggs \_\_\_\_\_

fruits \_\_\_\_\_; average number of portions per day \_\_\_\_\_

vegetables \_\_\_\_\_; average number of portions per day \_\_\_\_\_

fish \_\_\_\_\_

legumes \_\_\_\_\_

cereals (e.g., pasta, rice, bread) \_\_\_\_\_

gluten: yes / no

integral: yes / no

cured meat \_\_\_\_\_

salty snacks \_\_\_\_\_

sweet snacks and sweet drinks \_\_\_\_\_

dried fruit \_\_\_\_\_

3. Did you choose this kind of diet following counselling by:

☐ nutritionist

☐ oncologist

☐ breast oncologist

☐ other specialist

☐ family doctor

☐ other professional figure

☐ other figure

4. Did you take antibiotics during the last month? ☐ yes ☐ no

If yes, which one and how long? \_\_\_\_\_

5. Did you travel abroad during the last 3 months? ☐ yes ☐ no

If yes, where?

\_\_\_\_\_

6. Did you ever suffer of parasitosis? ☐ yes ☐ no

If yes, which kind?

\_\_\_\_\_

7. How do you define your faeces? ☐ liquid    ☐ soft    ☐ hard

8. Check the picture that most frequently reflects your daily stool:

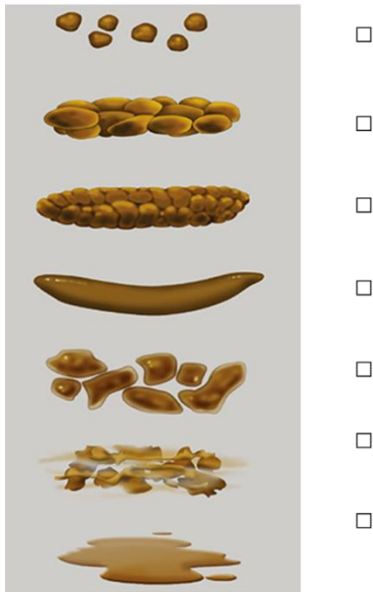

9. How many weekly bowel movements do you have?

\_\_\_\_\_

10. Do you suffer from intestinal disorders? ☐ yes ☐ no

If yes, which ones and how often? \_\_\_\_\_

11. How many times a week do you exercise? \_\_\_\_\_; what kind of physical activity do you do?

\_\_\_\_\_
