# Supplementary material for: The Relationship among Bowel [18]F-FDG PET Uptake, Pathological Complete Response, and Eating Habits in Breast Cancer Patients Undergoing Neoadjuvant Chemotherapy
Source: Nutrients. 2023 Jan 1;15(1):211. doi: 10.3390/nu15010211 (PMC9824388; doi:10.3390/nu15010211)
Supplement: Supplementary file 1 [file nutrients-15-00211-s001.zip › Table S1.pdf]

**Table S1.** Discriminant Function Analysis (DFA) Summary.

|                                  | <b>Wilks' -<br/>Lambda</b> | <b>Partial -<br/>Lambda</b> | <b>F-remove -<br/>(1.67)</b> | <b>p-level</b> | <b>Toler.</b> | <b>1-Toler. -<br/>(R-Sqr.)</b> |
|----------------------------------|----------------------------|-----------------------------|------------------------------|----------------|---------------|--------------------------------|
| <b>Colon SUV<sub>mean</sub></b>  | 0.918325                   | 0.890059                    | 8.275905                     | 0.005384       | 0.386007      | 0.613993                       |
| <b>Cured meat</b>                | 0.897467                   | 0.910745                    | 6.566163                     | 0.012647       | 0.635799      | 0.364201                       |
| <b>Rectum SUV<sub>mean</sub></b> | 0.860525                   | 0.949843                    | 3.537979                     | 0.064325       | 0.422715      | 0.577285                       |
| <b>Fruits</b>                    | 0.833850                   | 0.980228                    | 1.351428                     | 0.249153       | 0.916603      | 0.083397                       |
| <b>Alcoholic drinks</b>          | 0.835096                   | 0.978766                    | 1.453526                     | 0.232204       | 0.818643      | 0.181357                       |
| <b>Red meat</b>                  | 0.832569                   | 0.981736                    | 1.246431                     | 0.268223       | 0.674051      | 0.325950                       |
